# Supplementary material
Source: PubMed Central journal article supplement (PMC9538075)
Supplement: SLCT-7-0-s001.pdf [file SLCT-7-0-s001.pdf]

# ChemistrySelect

Supporting Information

## **Structural and Molecular Packing study of Three New Amidophosphoric Acid Esters and Assessment of Their Inhibiting Activity Against SARS-CoV-2 by Molecular Docking**

Nafiseh Heidari, Atekeh Tarahhomi,\* and Arie van der Lee

**Table S1.** Selected bond lengths (Å) and angles (°) for compounds **1** – **3**.

|             |             |             |             |
|-------------|-------------|-------------|-------------|
| <b>1</b>    |             | <b>1</b>    |             |
| P1—O2       | 1.5834 (19) | P1—N10      | 1.603 (2)   |
| P1—O6       | 1.5843 (19) | P16—N25     | 1.602 (2)   |
| P1—O9       | 1.459 (2)   | P31—N40     | 1.603 (2)   |
| P16—O17     | 1.5811 (19) | C3—O2       | 1.452 (3)   |
| P16—O21     | 1.5828 (19) | C18—O17     | 1.451 (3)   |
| P16—O24     | 1.460 (2)   | C33—O32     | 1.452 (3)   |
| P31—O32     | 1.5815 (19) | C11—N10     | 1.480 (4)   |
| P31—O37     | 1.582 (2)   | C26—N25     | 1.476 (4)   |
| P31—O39     | 1.459 (2)   | C41—N40     | 1.469 (4)   |
| O2—P1—O6    | 102.28 (10) | O17—P16—N25 | 105.77 (13) |
| O2—P1—O9    | 115.00 (11) | O21—P16—N25 | 105.18 (13) |
| O6—P1—O9    | 113.15 (12) | O24—P16—N25 | 114.54 (12) |
| O2—P1—N10   | 105.62 (12) | O32—P31—O37 | 102.32 (10) |
| O6—P1—N10   | 104.80 (13) | O32—P31—O39 | 114.64 (12) |
| O9—P1—N10   | 114.71 (12) | O37—P31—O39 | 113.13 (12) |
| O17—P16—O21 | 102.48 (10) | O32—P31—N40 | 105.13 (13) |
| O17—P16—O24 | 114.70 (12) | O37—P31—N40 | 105.49 (13) |
| O21—P16—O24 | 112.99 (12) | O39—P31—N40 | 114.89 (12) |
| <b>2</b>    |             | <b>3</b>    |             |
| P1—O2       | 1.4571 (14) | P1—O2       | 1.4584 (18) |
| P1—O3       | 1.5663 (12) | P1—O3       | 1.5752 (15) |
| P1—O7       | 1.5700 (13) | P1—O8       | 1.5858 (17) |
| P1—N10      | 1.6395 (17) | P1—N10      | 1.599 (2)   |
| C4—O3       | 1.452 (2)   | C7—O8       | 1.458 (3)   |
| C6—O7       | 1.449 (2)   | C4—O3       | 1.459 (2)   |
| C11—N10     | 1.401 (2)   | C11—N10     | 1.474 (3)   |
| C11—N12     | 1.320 (2)   | C14—N10     | 1.473 (3)   |
| O2—P1—O3    | 112.01 (8)  | O2—P1—O3    | 114.90 (10) |
| O2—P1—O7    | 110.87 (8)  | O2—P1—O8    | 114.12 (10) |
| O3—P1—O7    | 105.38 (7)  | O3—P1—O8    | 102.66 (8)  |
| O2—P1—N10   | 116.10 (9)  | O2—P1—N10   | 113.83 (10) |
| O3—P1—N10   | 102.74 (8)  | O3—P1—N10   | 104.96 (10) |
| O7—P1—N10   | 108.94 (8)  | O8—P1—N10   | 105.15 (11) |

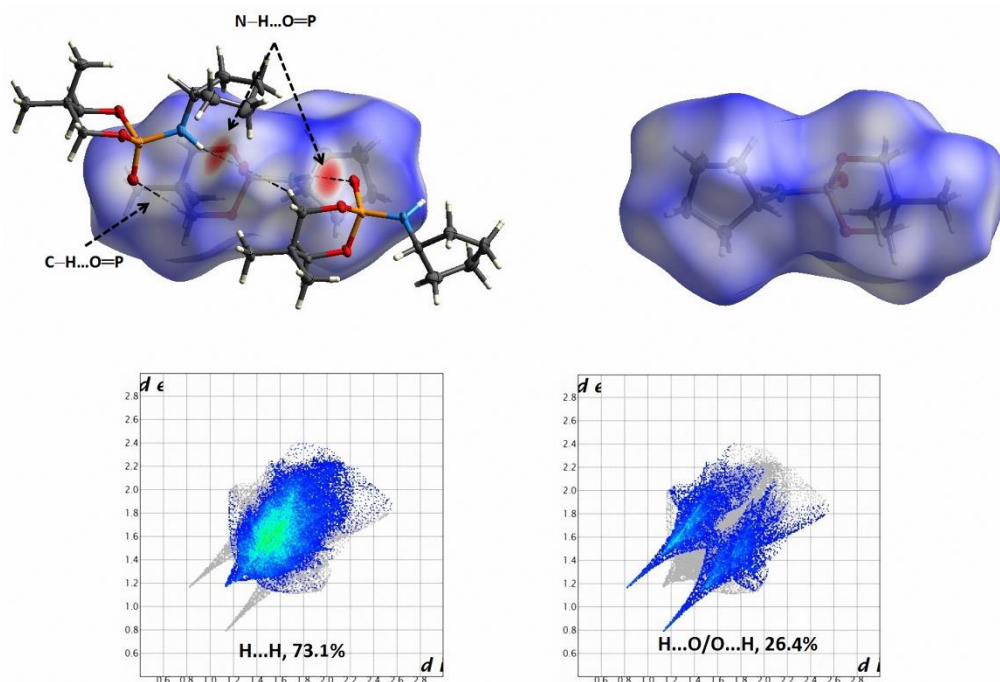

**Figure S1.** Views of the  $d_{\text{norm}}$  Hirshfeld surface maps (up) plotted on the molecule P16 of **1** in two orientations, introducing close contacts, along with the H...H and H...O/O...H fingerprint plots (down).

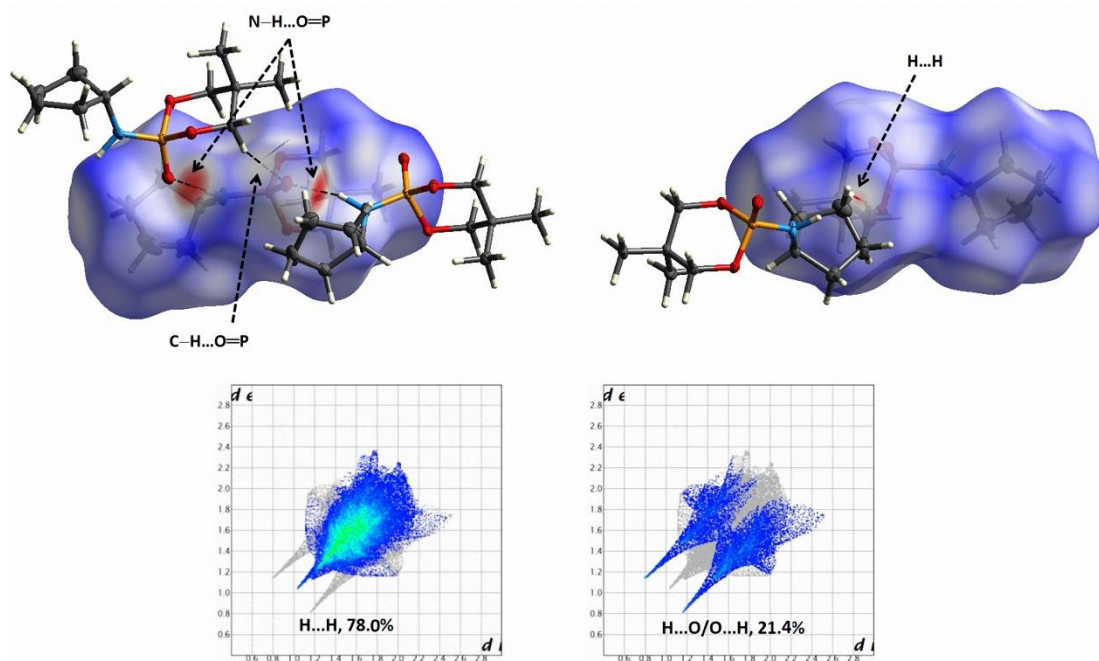

**Figure S2.** Views of the  $d_{\text{form}}$  Hirshfeld surface maps (up) plotted on the molecule P31 of **1** in two orientations, introducing close contacts, along with the H...H and H...O/O...H fingerprint plots (down).

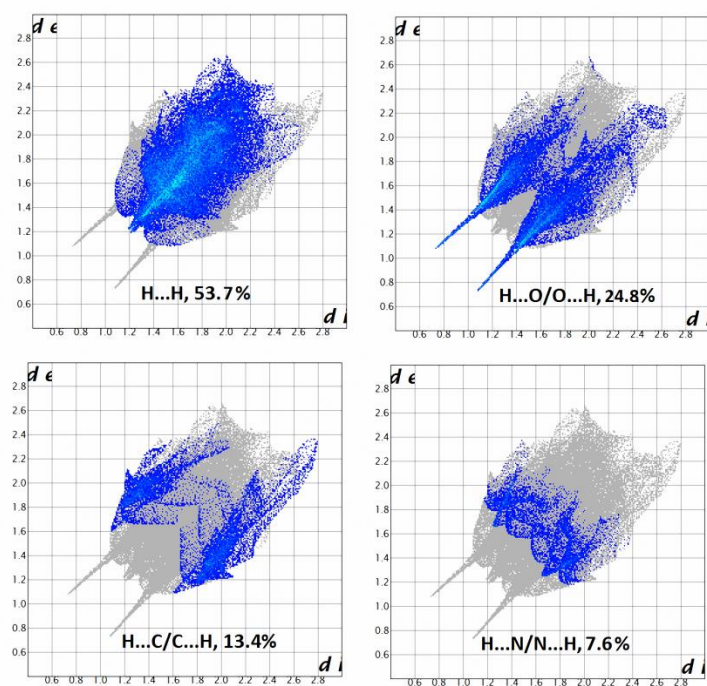

**Figure S3.** The decomposed fingerprint plots for the compound **2** have been presented.

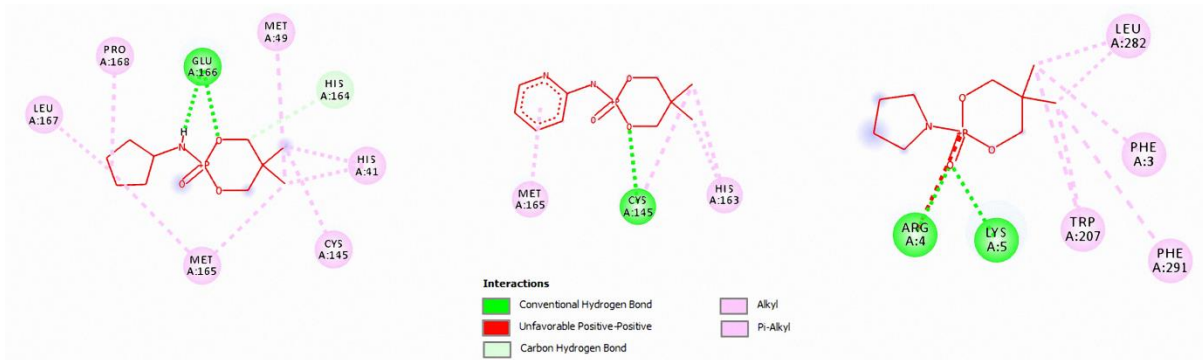

Figure S4. The 2D ligand maps of the compounds 1 – 3 with amino acid sites inside of the active pocket of 6M03.

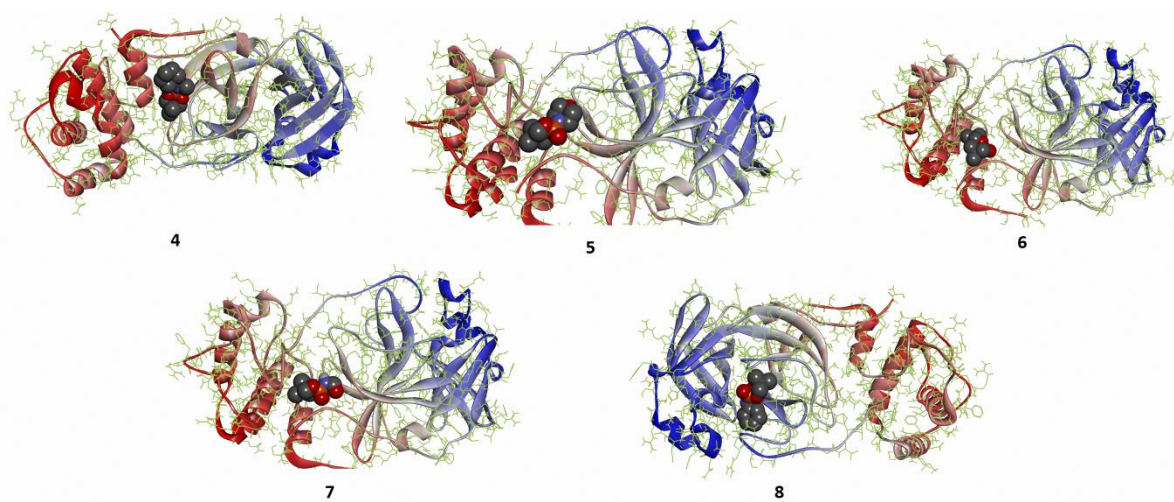

Figure S5. The best poses of the 3D compounds 4 – 8 in the binding pocket of 6M03.

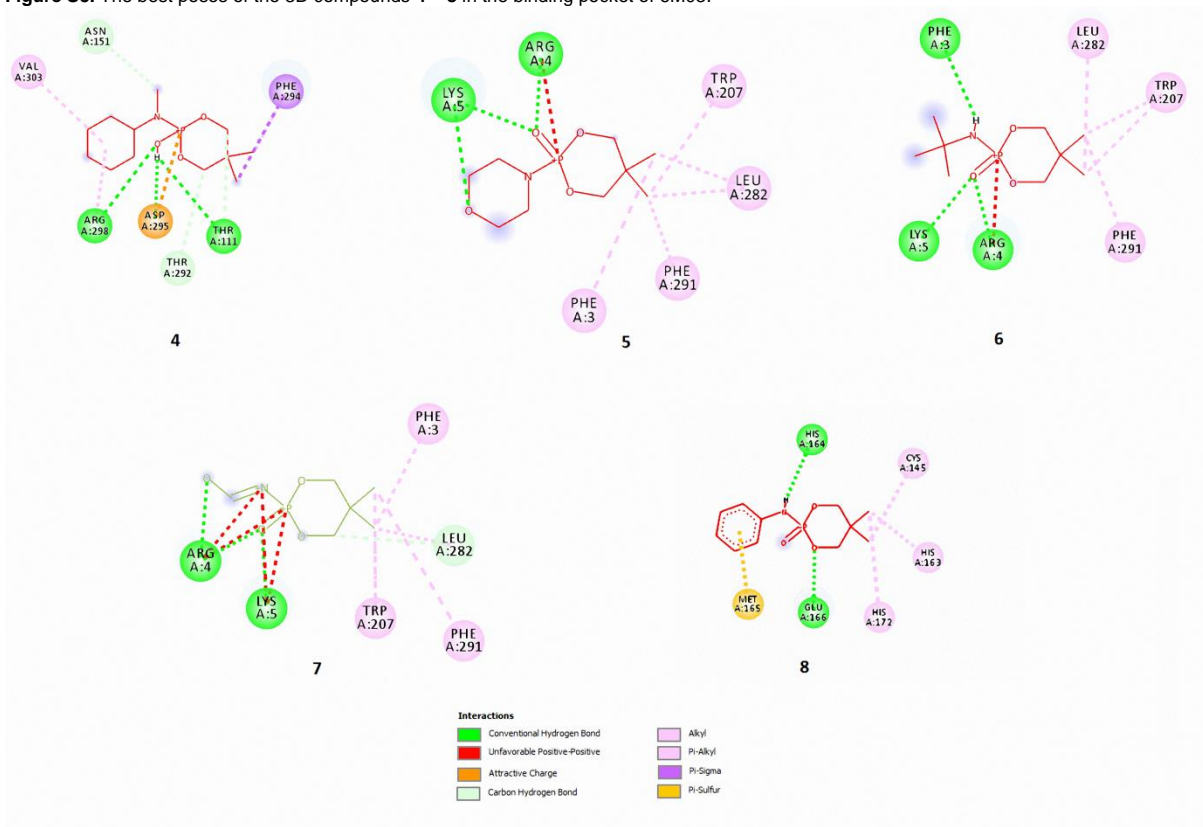

Figure S6. The 2D ligand maps of the compounds 4 – 8 with amino acid sites inside of the active pocket of 6M03.
